# Supplementary material for: Moderate-to-Vigorous Physical Activity and Response Inhibition Predict Balance in Adults with Attention Deficit/Hyperactivity Disorder
Source: MDPI journal article supplement (doi:10.3390/jcm13040968), 2024-02-08
Supplement: s1 [file s1]

**Supplementary Table S1. Pearson Correlation Coefficients Between Balance and Anthropometric Variables When Off-Medication.**

| Variable                                | n  | M     | SD   | 1    | 2     |
|-----------------------------------------|----|-------|------|------|-------|
| 1. Body mass (kg)                       | 40 | 81.8  | 24.2 | —    |       |
| 2. Body height (cm)                     | 40 | 170.5 | 9.4  | 0.43 | —     |
| 3. FAEO (sway area in cm <sup>2</sup> ) | 40 | 1.5   | 2.2  | 0.08 | 0.24  |
| 4. FAEC (sway area in cm <sup>2</sup> ) | 40 | 1.7   | 1.7  | 0.06 | 0.04  |
| 5. FTEO (sway area in cm <sup>2</sup> ) | 40 | 6.4   | 5.5  | 0.08 | -0.04 |
| 6. FTEC (sway area in cm <sup>2</sup> ) | 40 | 9.2   | 5.8  | 0.20 | 0.04  |

**Supplementary Table S2. Pearson Correlation Coefficients Between Balance and Anthropometric Variables When On-Medication.**

| Variable                                | n  | M     | SD   | 1    | 2     |
|-----------------------------------------|----|-------|------|------|-------|
| 1. Body mass (kg)                       | 40 | 81.8  | 24.2 | —    |       |
| 2. Body height (cm)                     | 40 | 170.5 | 9.4  | 0.43 | —     |
| 3. FAEO (sway area in cm <sup>2</sup> ) | 40 | 1.4   | 1.4  | 0.05 | 0.28  |
| 4. FAEC (sway area in cm <sup>2</sup> ) | 40 | 1.3   | 0.8  | 0.08 | -0.03 |
| 5. FTEO (sway area in cm <sup>2</sup> ) | 40 | 4.6   | 2.0  | 0.13 | 0.05  |
| 6. FTEC (sway area in cm <sup>2</sup> ) | 40 | 7.6   | 4.8  | 0.28 | 0.12  |
